# Supplementary material
Source: publisher site journal article supplement (https://www.spandidos-publications.com/3132/downloadSupplementary)
Supplement: Supplementary file 1 [file downloadSupplementary]

## Sheet: Sheet1
Table SXIII. Differentially expressed mRNA potentially targeted by cis-acting co-expressed differentially expressed long non-coding RNAs.
Chromosome	Start	End	Strands	LncRNA_id	Chromosome	Start	End	Strands	Gene_id	Gene_name	DEmRNA	r
1	258002993	258004282	+	NONRATT001713.2	1	257970344	258004434	+	ENSRNOG00000052810	Cyp2c11	Cyp2c11	0.819304
1	101688780	101690849	+	NONRATT000710.2	1	101688296	101692804	+	ENSRNOG00000021027	Dbp	Dbp	0.868724
5	105003830	105004441	-	NONRATT023367.2	5	104984413	105010857	-	ENSRNOG00000007060	Plin2	Plin2	0.871638
3	105470970	105474339	+	NONRATT018453.2	3	105467479	105470475	-	ENSRNOG00000008337	Gjd2	Gjd2	0.894986
1	101688324	101689835	+	NONRATT000709.2	1	101688296	101692804	+	ENSRNOG00000021027	Dbp	Dbp	0.8965
20	331995	334295	-	MSTRG.12799.3	20	321808	323703	-	ENSRNOG00000053746	Olr1668	Olr1668	0.900895
3	105470969	105477512	+	NONRATT018452.2	3	105467479	105470475	-	ENSRNOG00000008337	Gjd2	Gjd2	0.903895
20	4093099	4093555	+	NONRATT017073.2	20	4094737	4097078	+	ENSRNOG00000033215	RT1-Db1	RT1-Db1	0.904664
17	42583935	42586365	-	NONRATT012959.2	17	42586479	42639922	-	ENSRNOG00000003094	Cmah	Cmah	0.926287
10	86300154	86301105	-	NONRATT005976.2	10	86303726	86312762	+	ENSRNOG00000028404	Ppp1r1b	Ppp1r1b	0.934048
2	20898482	20898797	+	NONRATT016005.2	2	20857201	20901659	+	ENSRNOG00000061414	Acot12	Acot12	0.936733
7	145147277	145149116	-	NONRATT027380.2	7	145146480	145154131	-	ENSRNOG00000036827	Ppp1r1a	Ppp1r1a	0.940986
7	145147277	145148275	-	NONRATT027379.2	7	145146480	145154131	-	ENSRNOG00000036827	Ppp1r1a	Ppp1r1a	0.943201
1	177765720	177766465	+	NONRATT001118.2	1	177764444	177765968	+	ENSRNOG00000014847	Rassf10	Rassf10	0.944577
7	145147281	145149879	-	NONRATT027381.2	7	145146480	145154131	-	ENSRNOG00000036827	Ppp1r1a	Ppp1r1a	0.95639
2	88402887	88403723	-	NONRATT016224.2	2	88384795	88414012	-	ENSRNOG00000010891	Lrrcc1	Lrrcc1	0.967198
2	88410568	88413958	-	NONRATT016226.2	2	88384795	88414012	-	ENSRNOG00000010891	Lrrcc1	Lrrcc1	0.969259
7	29959585	29961154	-	NONRATT026655.2	7	29959596	29986163	-	ENSRNOG00000025198	Gas2l3	Gas2l3	0.970783
12	30160774	30165923	+	NONRATT007430.2	12	30165693	30178341	+	ENSRNOG00000000903	Asl	Asl	0.984931
19	22621344	22632069	-	NONRATT014530.2	19	22590880	22626653	-	ENSRNOG00000059579	Gpt2	Gpt2	0.985723
2	210803868	210805276	-	NONRATT016768.2	2	210803868	210809306	-	ENSRNOG00000029726	Gstm1	Gstm1	0.990769
2	88404185	88408022	-	NONRATT016225.2	2	88384795	88414012	-	ENSRNOG00000010891	Lrrcc1	Lrrcc1	0.991649
9	41100447	41101108	+	NONRATT029307.2	9	41096834	41099189	+	ENSRNOG00000023603	Amer3	Amer3	0.9971
14	69896525	69899441	-	NONRATT009960.2	14	69899127	69927938	-	ENSRNOG00000038572	Ncapg	Ncapg	0.998091
7	29479206	29480053	+	NONRATT025711.2	7	29435443	29477947	+	ENSRNOG00000006367	Slc5a8	Slc5a8	0.999043
1	82337953	82338397	-	NONRATT002408.2	1	82327954	82344345	-	ENSRNOG00000020578	Ceacam1	Ceacam1	/
7	115825737	115827232	+	NONRATT026020.2	7	115766712	115826225	+	ENSRNOG00000029450	Adgrb1	Adgrb1	/
4	157753690	157755858	+	ENSRNOT00000088061	4	157744881	157750088	-	ENSRNOG00000027466	Cd27	Cd27	/
13	110219278	110220123	-	NONRATT009130.2	13	110220282	110257367	-	ENSRNOG00000004195	Dtl	Dtl	/
5	113871314	113872682	-	NONRATT023388.2	5	113871229	113880911	-	ENSRNOG00000026323	Eqtn	Eqtn	/
9	98484400	98484933	+	NONRATT029667.2	9	98460176	98483419	+	ENSRNOG00000024717	Espnl	Espnl	/
20	5050569	5051290	+	NONRATT017118.2	20	5054654	5056474	-	ENSRNOG00000026936	G6b	G6b	/
11	81421672	81423274	-	NONRATT007126.2	11	81423150	81444392	-	ENSRNOG00000030387	Kng1l1	Kng1l1	/
2	78174393	78184906	+	MSTRG.11575.7	2	78170223	78170524	+	ENSRNOG00000048993	Metazoa_SRP	Metazoa_SRP	/
20	330088	334272	-	MSTRG.12799.1	20	321808	323703	-	ENSRNOG00000053746	Olr1668	Olr1668	/
2	207131159	207131906	+	NONRATT015663.2	2	207108551	207128554	+	ENSRNOG00000019996	Slc16a1	Slc16a1	/
2	26500018	26501747	-	NONRATT015996.2	2	26501832	26699333	-	ENSRNOG00000018094	Sv2c	Sv2c	/
3	161039970	161045320	+	NONRATT018874.2	3	161036702	161040511	-	ENSRNOG00000042526	Wfdc6a	Wfdc6a	/
The coefficient r represents the correlation of expression levels between the long non-coding RNA and mRNA according to Pearson’s analysis.

## Sheet: Sheet3
Cyp2c11
Dbp
Plin2
Gjd2
Olr1668
RT1-Db1
Cmah
Ppp1r1b
Acot12
Ppp1r1a
Rassf10
Lrrcc1
Gas2l3
Asl
Gpt2
Gstm1
Amer3
Ncapg
Slc5a8

## Sheet: Sheet2
NONRATT001713.2
MSTRG.12799.3
NONRATT000709.2
NONRATT000710.2
NONRATT001118.2
NONRATT005976.2
NONRATT007430.2
NONRATT009960.2
NONRATT012959.2
NONRATT014530.2
NONRATT016005.2
NONRATT016224.2
NONRATT016225.2
NONRATT016226.2
NONRATT016768.2
NONRATT017073.2
NONRATT018452.2
NONRATT018453.2
NONRATT023367.2
NONRATT025711.2
NONRATT026655.2
NONRATT027379.2
NONRATT027380.2
NONRATT027381.2
NONRATT029307.2
